# Supplementary material for: Superb Li-Ion Storage of Sn-Based Anode Assisted by Conductive Hybrid Buffering Matrix
Source: MDPI journal article supplement (doi:10.3390/nano13202757), 2023-10-13
Supplement: s1 [file s1]

## **Supplementary Materials**

### **Superb Li-ion storage of Sn-based anode assisted by the conductive hybrid buffering matrix**

Jinsil Shin<sup>1</sup>, Sung-Hoon Park<sup>2\*</sup>, Jaehyun Hur<sup>1\*</sup>

<sup>1</sup>Department of Chemical and Biological Engineering, Gachon University, 1342 Seongnam-daero, Seongnam 13120, Republic of Korea

<sup>2</sup>Department of Mechanical Engineering, Soongsil University, 369 Sangdo-ro, Dongjakgu, Seoul 06978, Republic of Korea

Correspondence should be addressed to Prof. Jaehyun Hur\* (jhhur@gachon.ac.kr) and Prof. Sung-Hoon Park\* (leopark@ssu.ac.kr).

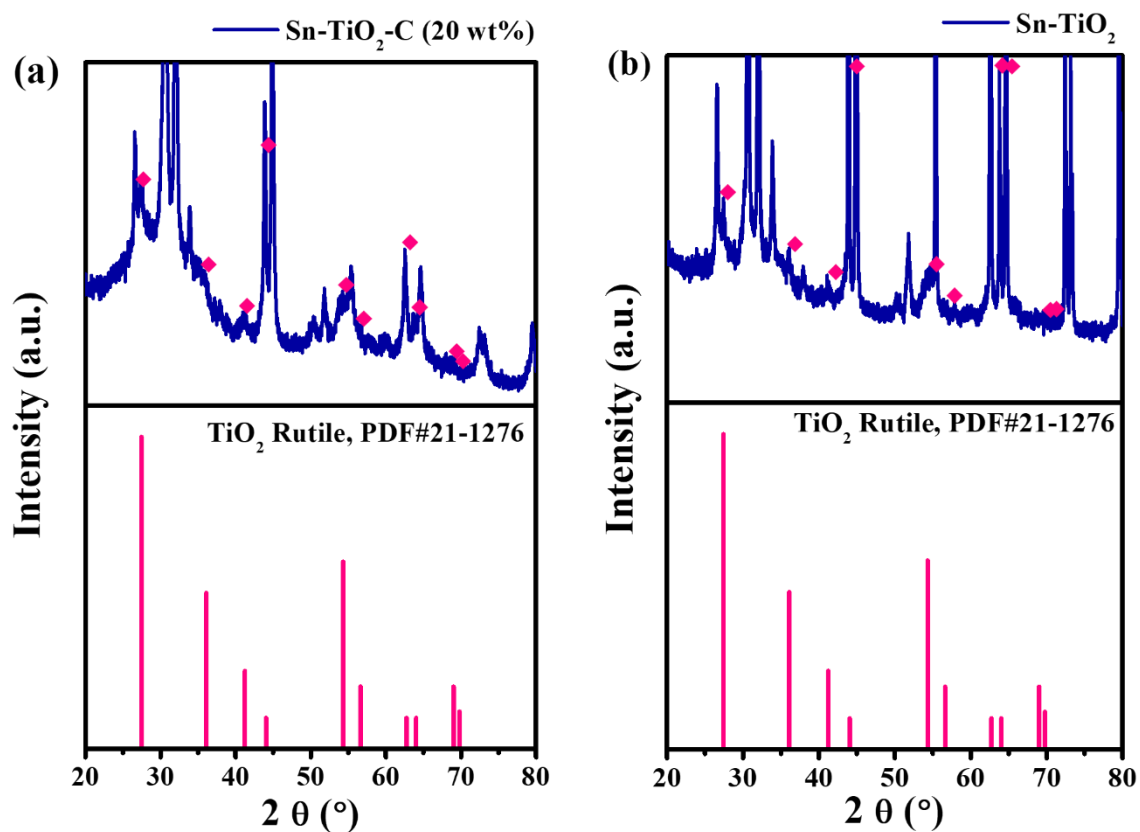

**Figure S1.** Enlarged view of XRD spectra of (a) Sn-TiO<sub>2</sub>-C (20 wt%) and (b) Sn-TiO<sub>2</sub> along with theoretical peak of rutile TiO<sub>2</sub> (PDF#21-1276).

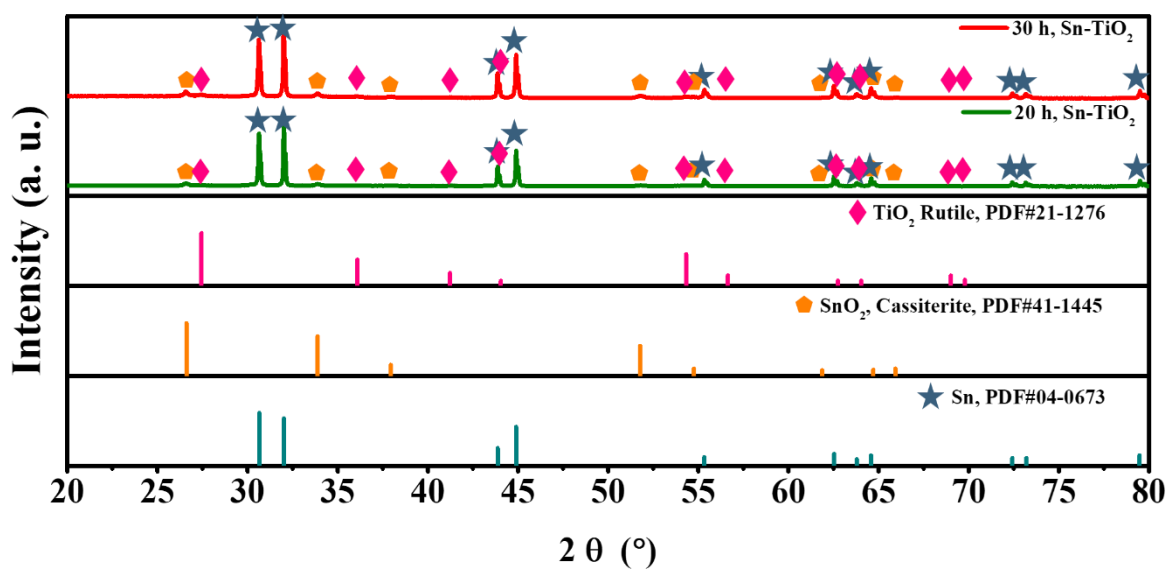

**Figure S2.** XRD spectra of Sn-TiO<sub>2</sub> after 20 h and 30 h milling.

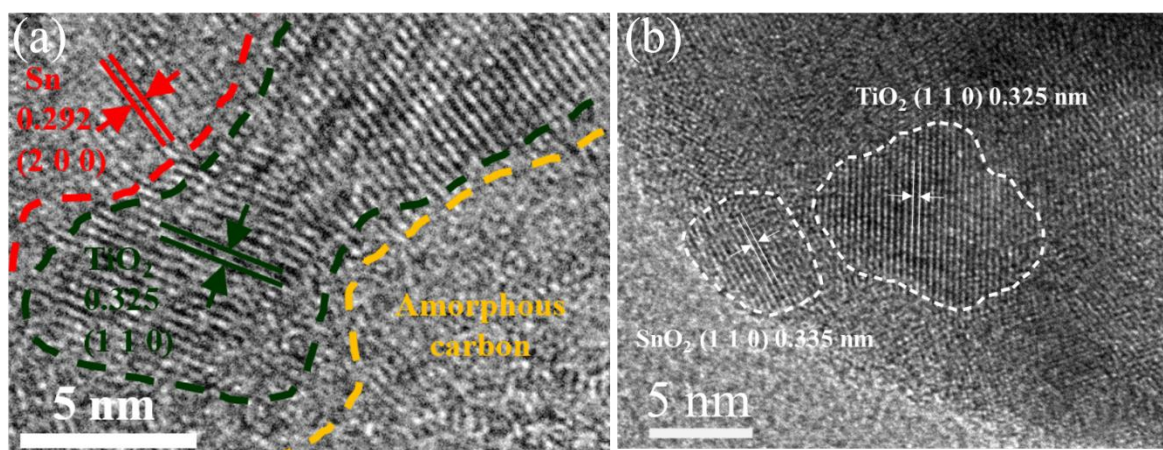

**Figure S3.** HRTEM image of Sn-TiO<sub>2</sub>-C (20 wt%) showing the existence of (a) Sn, TiO<sub>2</sub> and amorphous carbon, (b) SnO<sub>2</sub>.

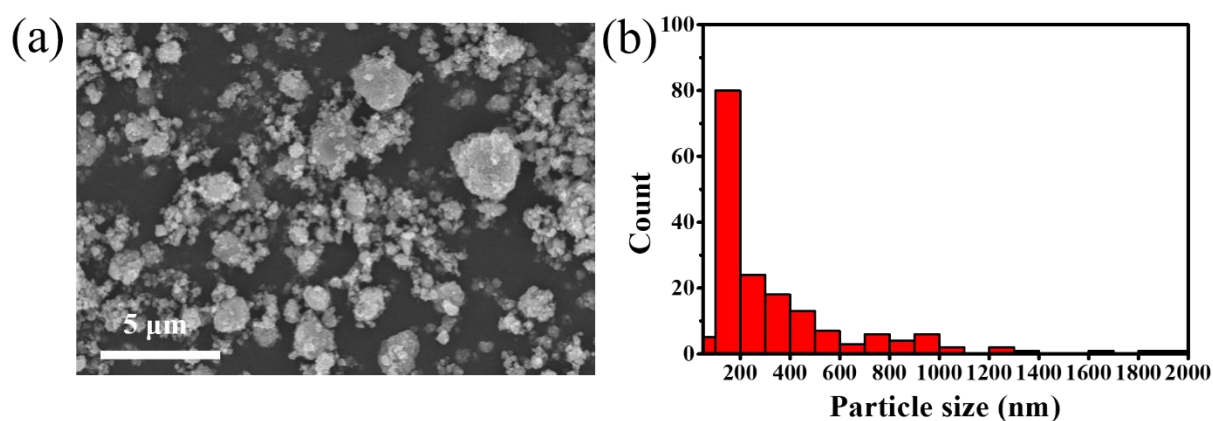

**Figure S4.** (a) SEM image and (b) particle size distribution of Sn-TiO<sub>2</sub>-C (20wt%).

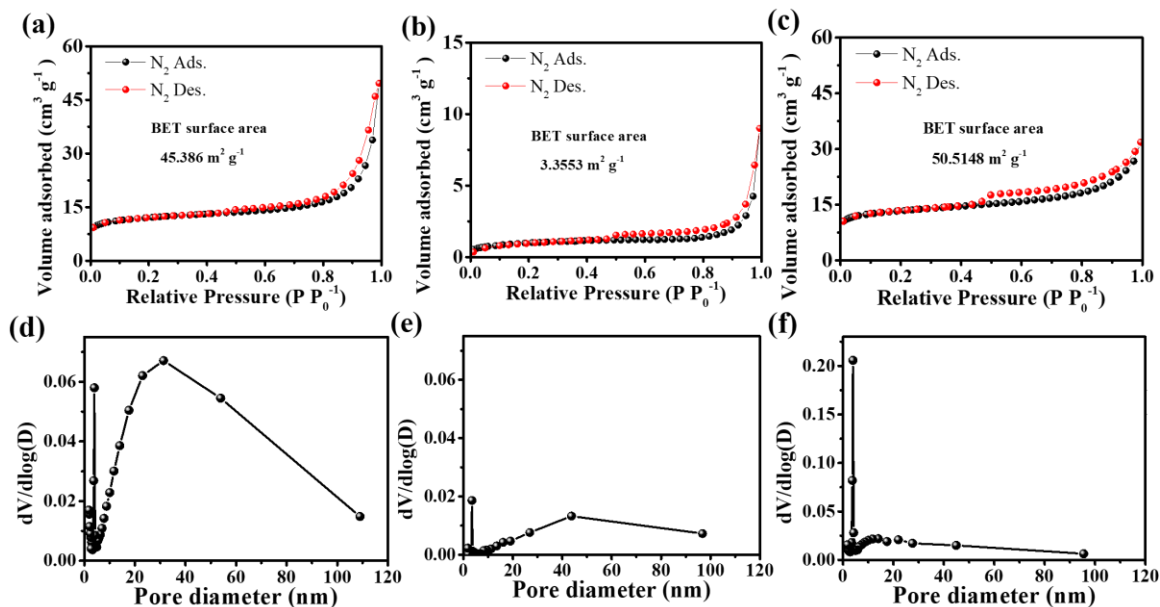

**Figure S5.** N<sub>2</sub> adsorption/desorption isotherm of (a) Sn-TiO<sub>2</sub>-C (20 wt%), (b) Sn-TiO<sub>2</sub>, and (c) Sn-C (20 wt%) at standard temperature and pressure condition. Pore distribution of (d) Sn-TiO<sub>2</sub>-C (20 wt%), (e) Sn-TiO<sub>2</sub>, and (f) Sn-C (20 wt%).

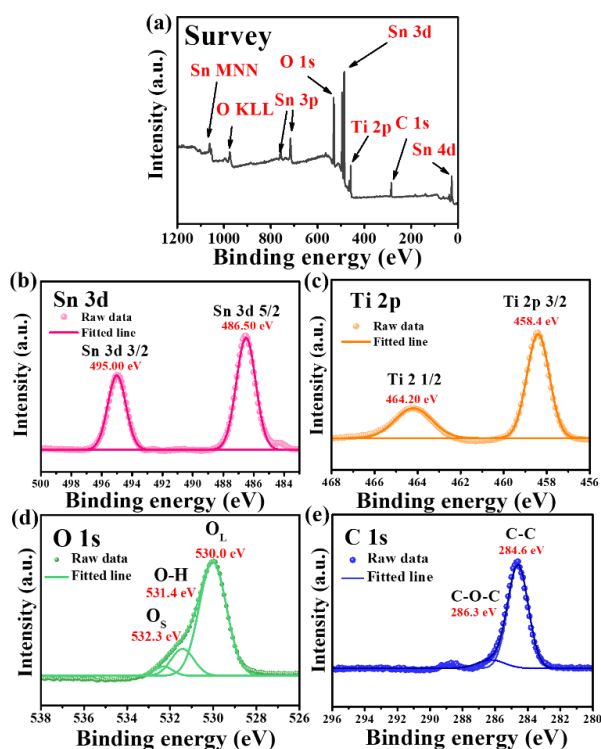

**Figure S6.** High-resolution XPS spectra of Sn-TiO<sub>2</sub> powder. (a) survey (b) Sn, (c) Ti, (d) O (O<sub>L</sub> (lattice oxygen), O-H bond, and O<sub>s</sub> (adsorbed oxygen)), and (e) C

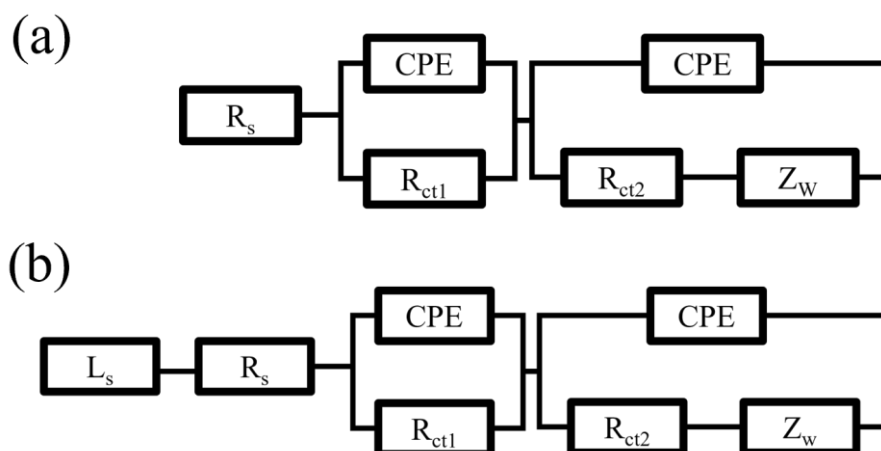

**Figure S7.** The equivalent circuit for (a) Sn-TiO<sub>2</sub>-C (20 wt%) and (b) Sn-TiO<sub>2</sub> and Sn-C (20 wt%).

**Table. S1.** Theoretical capacity of Sn-TiO<sub>2</sub>-C (20 wt%), Sn-TiO<sub>2</sub>, and Sn-C (20 wt%)

| Composite                       | Theoretical capacity    |
|---------------------------------|-------------------------|
| Sn-TiO <sub>2</sub> -C (20 wt%) | 657 mAh g <sup>-1</sup> |
| Sn-TiO <sub>2</sub>             | 728 mAh g <sup>-1</sup> |
| Sn-C (20 wt%)                   | 869 mAh g <sup>-1</sup> |

**Table S2.** Performance of Sn-based anode for Li-ion batteries

| Composite | Specific capacity         | Cycles number | Current density        | Ref  |
|-----------|---------------------------|---------------|------------------------|------|
| Sn-C      | 410 mAh g <sup>-1</sup>   | 100 cycles    | 100 mA g <sup>-1</sup> | [19] |
| Sn-Co     | 515.5 mAh g <sup>-1</sup> | 50 cycles     | 50 mA g <sup>-1</sup>  | [20] |
| Sn/CNT    | 413 mAh g <sup>-1</sup>   | 100 cycles    | 30 mA g <sup>-1</sup>  | [21] |
| Sn-Ca     | 280 mAh g <sup>-1</sup>   | 60 cycles     | 50 mA g <sup>-1</sup>  | [22] |
| 3D Cu-Sn  | 590 mAh g <sup>-1</sup>   | 50 cycles     | 0.3 C                  | [23] |

|                        |                            |            |                        |           |
|------------------------|----------------------------|------------|------------------------|-----------|
| 3D DHP Cu-Sn           | 11.95 mAh cm <sup>-2</sup> | 50 cycles  | 1 mA cm <sup>-2</sup>  | [24]      |
| Np-GeSn <sub>5</sub>   | 974mAh g <sup>-1</sup>     | 500 cycles | 200 mA g <sup>-1</sup> | [25]      |
| Sn-MOF/G               | 462 mAh g <sup>-1</sup>    | 500 cycles | 1 A g <sup>-1</sup>    | [26]      |
| Sn-Ni                  | 448.9 mAh g <sup>-1</sup>  | 20 cycles  | 0.1 C                  | [27]      |
| SnSb-C                 | 300 mAh g <sup>-1</sup>    | 100 cycles | 100 mA g <sup>-1</sup> | [28]      |
| SnS <sub>x</sub> /NRGO | 562 mAh g <sup>-1</sup>    | 200 cycles | 0.2 A g <sup>-1</sup>  | [29]      |
| Sn-TiO <sub>2</sub> -C | 669 mAh g <sup>-1</sup>    | 100 cycles | 200 mA g <sup>-1</sup> | This work |

**Table S3.** Coulombic efficiency of Sn-TiO<sub>2</sub>-C (20 wt%), Sn-TiO<sub>2</sub>, and Sn-C (20 wt%) at 1, 2, 3, 10, and 50th cycle at current density of 200 mA g<sup>-1</sup>

| Cycle number           | Coulombic efficiency            |                     |               |
|------------------------|---------------------------------|---------------------|---------------|
|                        | Sn-TiO <sub>2</sub> -C (20 wt%) | Sn-TiO <sub>2</sub> | Sn-C (20 wt%) |
| <b>1<sup>st</sup></b>  | 81.89                           | 63.54               | 73.50         |
| <b>2<sup>nd</sup></b>  | 84.38                           | 67.56               | 90.78         |
| <b>3<sup>rd</sup></b>  | 95.51                           | 89.12               | 91.24         |
| <b>10<sup>th</sup></b> | 98.31                           | 96.19               | 94.43         |
| <b>50<sup>th</sup></b> | 98.73                           | 98.30               | 97.54         |

**Table S4.** Fitted parameter values of  $R_s$ ,  $R_{ct1}$ , and  $R_{ct2}$  of Sn-TiO<sub>2</sub>-C (20 wt%), Sn-TiO<sub>2</sub>, and Sn-C (20 wt%) at 200 mA g<sup>-1</sup> after 20 cycles

| Parameter | Sn-TiO <sub>2</sub> -C (20 wt%) | Sn-TiO <sub>2</sub> | Sn-C (20 wt%)      |
|-----------|---------------------------------|---------------------|--------------------|
| $R_s$     | 2.62                            | 5.59                | 3.56               |
| $R_{ct1}$ | $4.83 \times 10^1$              | $6.45 \times 10^1$  | $9.83 \times 10^1$ |
| $R_{ct2}$ | $1.80 \times 10^2$              | $2.17 \times 10^2$  | $1.95 \times 10^2$ |
